# Supplementary material
Source: PubMed Central journal article supplement (PMC6765421)
Supplement: NIHMS1536466-supplement-2.pdf [file NIHMS1536466-supplement-2.pdf]

## Appendix 2. Graph analyses.

93 ROIs

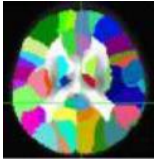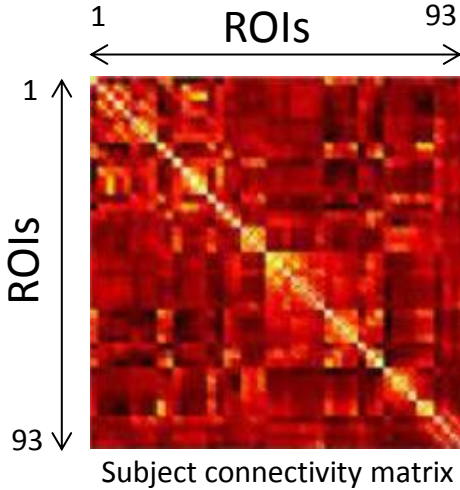

|       | ROI 1    | ROI 2    | ROI 3    | ROI 4    |
|-------|----------|----------|----------|----------|
| ROI 1 | 1        | $r_{12}$ | $r_{13}$ | $r_{41}$ |
| ROI 2 | $r_{21}$ | 1        | $r_{23}$ | $r_{24}$ |
| ROI 3 | $r_{31}$ | $r_{31}$ | 1        | $r_{34}$ |
| ROI 4 | $r_{41}$ | $r_{42}$ | $r_{43}$ | 1        |

A smaller connectivity matrix with only 4 ROIs. Each cell (small box) will contain the correlation between the column and row ROIs, for example, the box colored yellow is the correlation between ROI 4 and ROI 1

↓ thresholded,  
binarized

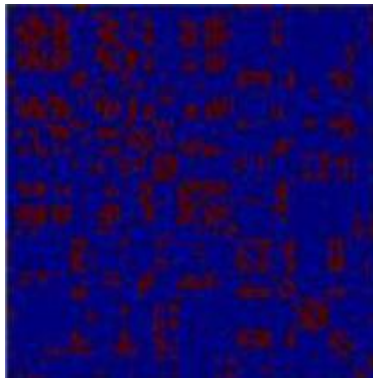

Binary, undirected network

↓

### Graph metrics

- Clustering coefficient
- Characteristic path length
- Small world index
- Global efficiency
- Local efficiency

↘ average

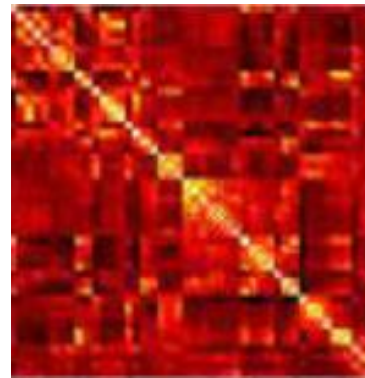

93 x 93 group averaged  
connectome

↓ thresholded,  
binarized

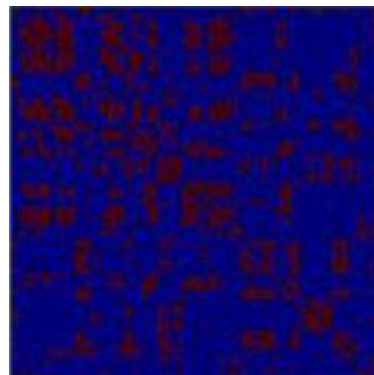

### Graph metrics

- Modularity
